# Supplementary material for: Roles of MALAT1 in development and migration of triple negative and Her-2 positive breast cancer
Source: PubMed Central journal article supplement (PMC5788637; doi:10.18632/oncotarget.23370), 2017-12-18
Supplement: oncotarget-09-2255-s001.pdf [file oncotarget-09-2255-s001.pdf]

## Roles of MALAT1 in development and migration of triple negative and Her-2 positive breast cancer

### SUPPLEMENTARY MATERIALS

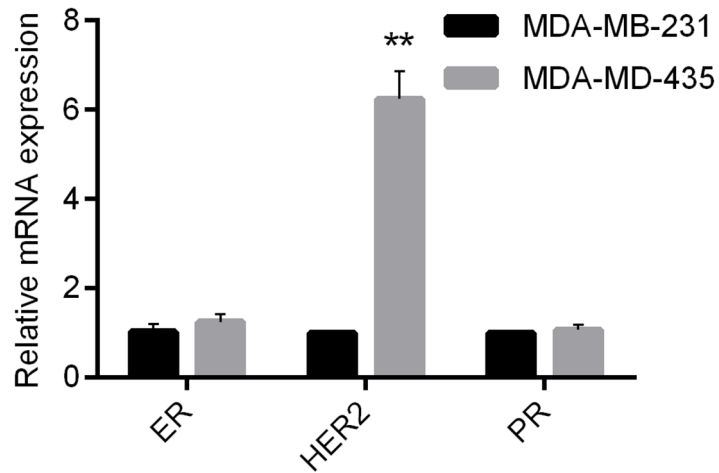

Supplementary Figure 1: Expressions of ER, PR and Her-2 in MDA-MB-231 and MDA-MD-435 Detected by qRT-PCR. \*\*,  $p < 0.01$ .

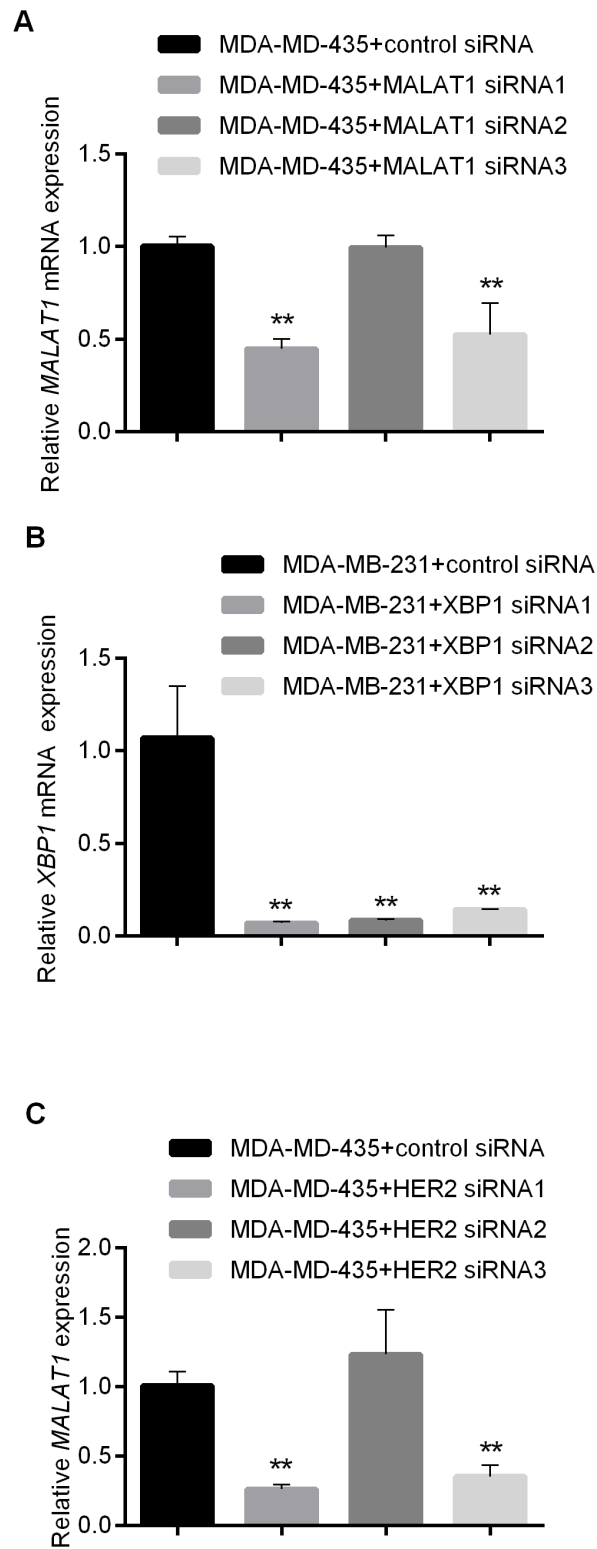

**Supplementary Figure 2:** Interference Effects of (A) MALAT1 siRNA, (B) XBP1 siRNA and (C) HER2 siRNA in MDA-MB-231 and MDA-MD-435 Detected by qRT-PCR. \*\*, p<0.01.

Supplementary Table 1: Comparison of patient's related information and prognostic factors

| NO. | Tumor type      | First visit age | Pathological type                                                       | Clinical examination revealed the maximum diameter of the tumor(cT)/cm | Lymph node staging | pTNM pathological staging | Number of metastatic lymph nodes | OS/ months | RFS/ months |
|-----|-----------------|-----------------|-------------------------------------------------------------------------|------------------------------------------------------------------------|--------------------|---------------------------|----------------------------------|------------|-------------|
| 1   | triple negative | 44              | Invasive medullary carcinoma                                            | 2.5                                                                    | 0                  | IIA                       | 0                                | 74         | 74          |
| 2   | triple negative | 63              | Invasive ductal carcinoma                                               | 1.5                                                                    | 0                  | I                         | 0                                | 73         | 73          |
| 3   | triple negative | 56              | Invasive ductal carcinoma                                               | 2.3                                                                    | 0                  | IIA                       | 0                                | 73         | 73          |
| 4   | triple negative | 39              | Invasive ductal carcinoma                                               | 1.9                                                                    | 0                  | I                         | 0                                | 70         | 70          |
| 5   | triple negative | 46              | Invasive ductal carcinoma                                               | 2.2                                                                    | 0                  | IIA                       | 0                                | 64         | 64          |
| 6   | triple negative | 43              | Invasive ductal carcinoma                                               | 4.3                                                                    | 2                  | IIIA                      | 7                                | 81         | 81          |
| 7   | triple negative | 47              | Invasive ductal carcinoma                                               | 2.2                                                                    | 2                  | IIIA                      | 8                                | 74         | 74          |
| 8   | triple negative | 82              | Invasive ductal carcinoma                                               | 5                                                                      | 3                  | IIIC                      | 17                               | 23         | 6           |
| 9   | triple negative | 27              | Invasive ductal carcinoma                                               | 2.5                                                                    | 2                  | IIB                       | 4                                | 51         | 21          |
| 10  | triple negative | 55              | Invasive ductal carcinoma, part of tumor is metaplastic carcinoma       | 2.3                                                                    | 2                  | IIB                       | 4                                | 84         | 84          |
| 11  | Her-2 positive  | 60              | Invasive ductal carcinoma                                               | 3                                                                      | 0                  | IIA                       | 0                                | 88         | 88          |
| 12  | Her-2 positive  | 41              | Invasive ductal carcinoma with giving priority to intraductal carcinoma | 6.5                                                                    | 0                  | IIB                       | 0                                | 86         | 38          |
| 13  | Her-2 positive  | 43              | Invasive ductal carcinoma                                               | 1.2                                                                    | 0                  | I                         | 0                                | 72         | 72          |
| 14  | Her-2 positive  | 43              | Invasive ductal carcinoma with giving priority to intraductal carcinoma | 4                                                                      | 0                  | I                         | 0                                | 70         | 70          |
| 15  | Her-2 positive  | 71              | Invasive ductal carcinoma                                               | 4.5                                                                    | 0                  | IIA                       | 0                                | 72         | 72          |
| 16  | Her-2 positive  | 52              | Invasive ductal carcinoma                                               | 3                                                                      | 2                  | IIIA                      | 4                                | 75         | 8           |
| 17  | Her-2 positive  | 53              | Invasive ductal carcinoma                                               | 1.5                                                                    | 2                  | IIIA                      | 4                                | 69         | 69          |
| 18  | Her-2 positive  | 66              | Invasive ductal carcinoma                                               | 5                                                                      | 2                  | IIIA                      | 6                                | 24         | 16          |
| 19  | Her-2 positive  | 49              | Invasive ductal carcinoma                                               | 6                                                                      | 3                  | IIIC                      | 17                               | 52         | 42          |
| 20  | Her-2 positive  | 59              | Invasive ductal carcinoma                                               | 2.7                                                                    | 3                  | IIIC                      | 21                               | 30         | 18          |

Supplementary Table 2: SiRNA sequence information

|                | Name       | Sequence                  |
|----------------|------------|---------------------------|
| MALAT1- siRNA1 | sense      | GATCCATAATCGGTTTCAAGG     |
|                | Anti-sense | TTGAAACCGATTATGGATCAT     |
| MALAT1- siRNA2 | sense      | CACAGGGAAAGCGAGTGGTTGGTAA |
|                | Anti-sense | TTACCAACCACTCGCTTTCCTGTG  |
| MALAT1- siRNA3 | sense      | GGGCTTCTCTAACATTTATT      |
|                | Anti-sense | TAAATGTTAAGAGAAGCCCTT     |
| XBP1- siRNA1   | sense      | ACAGCAAGTGGTAGATTTATT     |
|                | Anti-sense | TAAATCTACCACTTGCTGTTT     |
| XBP1- siRNA2   | sense      | AGCTAATGTGGTAGTGAAATT     |
|                | Anti-sense | TTTCACTACCACATTAGCTTT     |
| XBP1- siRNA3   | sense      | CACCCTGAATTCATTGTCTTT     |
|                | Anti-sense | AGACAATGAATTCAGGGTGTT     |
| Her2- siRNA1   | sense      | CCTGTTCTCCGATGTGTAAGG     |
|                | Anti-sense | TTACACATCGGAGAACAGGGG     |
| Her2- siRNA2   | sense      | AGAGTGATGTGTGGAGTTATG     |
|                | Anti-sense | TAACTCCACACATCACTCTGG     |
| Her2- siRNA3   | sense      | GGGGCTGGCTCCGATGTATTT     |
|                | Anti-sense | ATACATCGGAGCCAGCCCCTT     |

Supplementary Table 3: q-PCR primer sequence information

| Name               | Sequence                |
|--------------------|-------------------------|
| Homo PR-F          | ATCCTGCCTCTCAATCACG     |
| Homo PR-R          | TTATCTTTAGAGCGGGCGG     |
| hER-F              | CCAGTACCAATGACAAGGGA    |
| hER-R              | CCACCTTTCATCATTCCCAC    |
| hHER2-F            | AGACAGAGTACCATGCAGAT    |
| hHER2-R            | GATCCCATCGTAAGGTTT      |
| ACTB-F             | GATGAGATTGGCATGGCTTT    |
| ACTB-R             | GTCACCTTCACCGTTCCAGT    |
| hCD47-F            | GGCACAAAACACTACTGAAG    |
| hCD47-R            | GAGACAGCATCACTCTTATC    |
| hMALAT1-F          | AAAGCAAGGTCTCCCCACAAG   |
| hMALAT1-R          | GGTCTGTGCAAGATCAAAAGGCA |
| hPD-L1-F           | GTAAGACCACCACCACCAAT    |
| hPD-L1-R           | TTCACATCCATCATTCTCCC    |
| hHIF-1 $\alpha$ -F | GGACAGTACAGGATGCTTGC    |
| hHIF-1 $\alpha$ -R | CGTGCTGAATAATACCACTC    |
| hc-MYC-F           | AAAACAATGAAAAGGCC       |
| hc-MYC-R           | CACAAGAGTTCCGTAGCTGT    |
| hXBP1-F            | CAGACTGCCAGAGATCGAAA    |
| hXBP1-R            | CTGGCCTCACTTCATTCCC     |
